# Supplementary material
Source: publisher site journal article supplement (https://www.dovepress.com/get_supplementary_file.php?f=433820.xlsx)
Supplement: Supplementary file 1 [file get_supplementary_file.php]

## Sheet: Sheet1
Correlation Analysis		AHI	Sex	BMI	MAI	N1 F3 Theta	N1 F3 Beta	N1 F4 Theta	N1 O1 Theta	N1 O1 Alpha	N3 F3 Theta	N3 O1 Theta	N3 O1 Alpha	N3 O2 Theta	N3 O2 Alpha	W F3 Alpha	W O1 Alpha	S100β	Uric acid	WASO	Sleep efficiency
AHI	r	1	-.339**	.312**	.567**	-.317**	-0.181218	-.277**	-0.0994344	-0.123966	-0.0706139	-.215*	-0.195939	-.242*	-.249*	0.133618	0.128618	.401*	0.041	N/A	N/A
	P		0.00090112	0.00637762	3.20668e-09	0.0020929	0.0838513	0.00750794	0.34566	0.239063	0.505966	0.0408716	0.0626895	0.0207863	0.0171336	0.201647	0.21919	0.018	0.714	N/A	N/A
Sex	r	-.339**	1	-0.0517872	-.205*	0.051789	0.171092	0.0638432	0.0624906	0.0943465	0.046609	0.0850087	0.0662451	0.0507587	0.045876	-.262*	-0.0242703	N/A	N/A	N/A	N/A
	P	0.00090112		0.65903	0.049011	0.623936	0.10296	0.54544	0.554003	0.37102	0.660869	0.423031	0.532701	0.632777	0.665882	0.0111119	0.817375	N/A	N/A	N/A	N/A
BMI	r	.312**	-0.0517872	1	.325**	0.0218675	-0.120438	0.0917898	-0.0713585	-0.142307	-0.0606698	0.0121456	0.0433782	-0.000436085	0.00398196	0.0388144	-0.0279843	0.179	0.23	N/A	N/A
	P	0.00637762	0.65903		0.0044557	0.853284	0.306716	0.436683	0.545731	0.226472	0.610131	0.918769	0.715561	0.997078	0.973328	0.74093	0.811627	0.354	0.057	N/A	N/A
MAI	r	.567**	-.205*	.325**	1	-0.132232	-0.131756	-0.0818694	-0.121813	-0.144659	-0.180493	-.262*	-.249*	-.305**	-.302**	0.0903275	0.0233834	.453**	0.186	N/A	N/A
	P	3.20668e-09	0.049011	0.0044557		0.20893	0.210589	0.437849	0.247385	0.168884	0.0868819	0.01226	0.0174897	0.00325958	0.00364793	0.389201	0.823939	0.007	0.09	N/A	N/A
N1 F3 Theta	r	-.317**	0.051789	0.0218675	-0.132232	1	.598**	.858**	.570**	.550**	.260*	.267*	.243*	.304**	.293**	0.147188	0.151329	-.424*	0.066	N/A	N/A
	P	0.0020929	0.623936	0.853284	0.20893		3.12734e-10	9.47622e-28	2.97365e-09	1.35023e-08	0.0126587	0.0105429	0.0200706	0.00338549	0.00475989	0.161479	0.14988	0.013	0.551	N/A	N/A
N1 F3 Beta	r	-0.181218	0.171092	-0.120438	-0.131756	.598**	1	.475**	.369**	.458**	0.141358	0.129201	0.151374	0.151524	0.161953	0.103326	.258*	N/A	N/A	N/A	N/A
	P	0.0838513	0.10296	0.306716	0.210589	3.12734e-10		1.73847e-06	0.000298588	4.51156e-06	0.181371	0.222242	0.152052	0.151642	0.125098	0.327017	0.0131276	N/A	N/A	N/A	N/A
N1 F4 Theta	r	-.277**	0.0638432	0.0917898	-0.0818694	.858**	.475**	1	.425**	.395**	.255*	0.196334	0.172198	.280**	.272**	0.190548	0.133137	-0.198	0.093	N/A	N/A
	P	0.00750794	0.54544	0.436683	0.437849	9.47622e-28	1.73847e-06		2.47014e-05	9.79443e-05	0.0149004	0.0621511	0.102644	0.00720303	0.00922741	0.0688523	0.205804	0.261	0.398	N/A	N/A
N1 O1 Theta	r	-0.0994344	0.0624906	-0.0713585	-0.121813	.570**	.369**	.425**	1	.950**	.382**	.379**	.346**	.294**	.228*	.238*	.500**	N/A	N/A	N/A	N/A
	P	0.34566	0.554003	0.545731	0.247385	2.97365e-09	0.000298588	2.47014e-05		3.57687e-47	0.000185135	0.000208428	0.000788004	0.00468525	0.0294307	0.0225964	3.83641e-07	N/A	N/A	N/A	N/A
N1 O1 Alpha	r	-0.123966	0.0943465	-0.142307	-0.144659	.550**	.458**	.395**	.950**	1	.355**	.369**	.362**	.281**	.236*	.251*	.550**	N/A	N/A	N/A	N/A
	P	0.239063	0.37102	0.226472	0.168884	1.35023e-08	4.51156e-06	9.79443e-05	3.57687e-47		0.000546368	0.000322969	0.000428024	0.00705245	0.0241975	0.0159337	1.35375e-08	N/A	N/A	N/A	N/A
N3 F3 Theta	r	-0.0706139	0.046609	-0.0606698	-0.180493	.260*	0.141358	.255*	.382**	.355**	1	.734**	.693**	.693**	.636**	0.150328	.302**	N/A	N/A	N/A	N/A
	P	0.505966	0.660869	0.610131	0.0868819	0.0126587	0.181371	0.0149004	0.000185135	0.000546368		1.28925e-16	2.69724e-14	2.68378e-14	1.19474e-11	0.154936	0.00365225	N/A	N/A	N/A	N/A
N3 O1 Theta	r	-.215*	0.0850087	0.0121456	-.262*	.267*	0.129201	0.196334	.379**	.369**	.734**	1	.955**	.925**	.865**	0.102784	.298**	-0.229	0.024	N/A	N/A
	P	0.0408716	0.423031	0.918769	0.01226	0.0105429	0.222242	0.0621511	0.000208428	0.000322969	1.28925e-16		9.92226e-49	3.38095e-39	2.02761e-28	0.332291	0.00418474	0.193	0.827	N/A	N/A
N3 O1 Alpha	r	-0.195939	0.0662451	0.0433782	-.249*	.243*	0.151374	0.172198	.346**	.362**	.693**	.955**	1	.892**	.899**	0.138419	.276**	N/A	N/A	N/A	N/A
	P	0.0626895	0.532701	0.715561	0.0174897	0.0200706	0.152052	0.102644	0.000788004	0.000428024	2.69724e-14	9.92226e-49		2.12272e-32	1.32494e-33	0.190708	0.00798343	N/A	N/A	N/A	N/A
N3 O2 Theta	r	-.242*	0.0507587	-0.000436085	-.305**	.304**	0.151524	.280**	.294**	.281**	.693**	.925**	.892**	1	.965**	0.153553	.239*	-0.214	0.013	N/A	N/A
	P	0.0207863	0.632777	0.997078	0.00325958	0.00338549	0.151642	0.00720303	0.00468525	0.00705245	2.68378e-14	3.38095e-39	2.12272e-32		2.5837e-53	0.146173	0.0227268	0.225	0.906	N/A	N/A
N3 O2 Alpha	r	-.249*	0.045876	0.00398196	-.302**	.293**	0.161953	.272**	.228*	.236*	.636**	.865**	.899**	.965**	1	0.154154	0.174126	N/A	N/A	N/A	N/A
	P	0.0171336	0.665882	0.973328	0.00364793	0.00475989	0.125098	0.00922741	0.0294307	0.0241975	1.19474e-11	2.02761e-28	1.32494e-33	2.5837e-53		0.144581	0.0987945	N/A	N/A	N/A	N/A
W F3 Alpha	r	0.133618	-.262*	0.0388144	0.0903275	0.147188	0.103326	0.190548	.238*	.251*	0.150328	0.102784	0.138419	0.153553	0.154154	1	.598**	N/A	N/A	N/A	N/A
	P	0.201647	0.0111119	0.74093	0.389201	0.161479	0.327017	0.0688523	0.0225964	0.0159337	0.154936	0.332291	0.190708	0.146173	0.144581		2.52204e-10	N/A	N/A	N/A	N/A
W O1 Alpha	r	0.128618	-0.0242703	-0.0279843	0.0233834	0.151329	.258*	0.133137	.500**	.550**	.302**	.298**	.276**	.239*	0.174126	.598**	1	N/A	N/A	N/A	N/A
	P	0.21919	0.817375	0.811627	0.823939	0.14988	0.0131276	0.205804	3.83641e-07	1.35375e-08	0.00365225	0.00418474	0.00798343	0.0227268	0.0987945	2.52204e-10		N/A	N/A	N/A	N/A
S100β	r	.401*	N/A	0.179	.453**	-.424*	N/A	-0.198	N/A	N/A	N/A	-0.229	N/A	-0.214	N/A	N/A	N/A	1	-0.026	.449**	‘-.368*
	P	0.018	N/A	0.354	0.007	0.013	N/A	0.261	N/A	N/A	N/A	0.193	N/A	0.225	N/A	N/A	N/A		0.885	0.008	0.032
Uric acid	r	0.041	N/A	0.23	0.186	0.066	N/A	0.093	N/A	N/A	N/A	0.024	N/A	0.013	N/A	N/A	N/A	-0.026	1	N/A	N/A
	P	0.714	N/A	0.057	0.09	0.551	N/A	0.398	N/A	N/A	N/A	0.827	N/A	0.906	N/A	N/A	N/A	0.885		N/A	N/A
WASO	r	N/A	N/A	N/A	N/A	N/A	N/A	N/A	N/A	N/A	N/A	N/A	N/A	N/A	N/A	N/A	N/A	.449**	N/A	1	N/A
	P	N/A	N/A	N/A	N/A	N/A	N/A	N/A	N/A	N/A	N/A	N/A	N/A	N/A	N/A	N/A	N/A	0.008	N/A		N/A
Sleep efficiency	r	N/A	N/A	N/A	N/A	N/A	N/A	N/A	N/A	N/A	N/A	N/A	N/A	N/A	N/A	N/A	N/A	‘-.368*	N/A	N/A	1
	P	N/A	N/A	N/A	N/A	N/A	N/A	N/A	N/A	N/A	N/A	N/A	N/A	N/A	N/A	N/A	N/A	0.032	N/A	N/A
Supplementary Table Correlation analysis among AHI, sex, BMI, MAI, power spectral density, S100β and uric acid, WASO and sleep efficiency
Notes：Star symbols represent statistical significance levels: “***” represents p < 0.001, “**” represents p < 0.01, “*” represents p < 0.05.
Abbreviations: AHI: apnea-hypopnea index; BMI: body mass index; MAI: microarousal index; WASO, wake time after sleep onset.
